# Supplementary material
Source: PubMed Central journal article supplement (PMC2910248)

# Figure S1

Enrichment profile correlations for regulatory elements in the ENCODE regions

**a**

| Promoter |      | GM   | K562 | ES   | dES  |
|----------|------|------|------|------|------|
|          | HeLa | 0.78 | 0.71 | 0.72 | 0.75 |
|          | GM   |      | 0.71 | 0.70 | 0.70 |
|          | K562 |      |      | 0.64 | 0.64 |
|          | ES   |      |      |      | 0.75 |

**b**

| CTCF |      | GM   | K562 | ES   | dES  | IMR90 |
|------|------|------|------|------|------|-------|
|      | HeLa | 0.87 | 0.79 | 0.65 | 0.76 | 0.61  |
|      | GM   |      | 0.84 | 0.68 | 0.78 | 0.59  |
|      | K562 |      |      | 0.65 | 0.76 | 0.60  |
|      | ES   |      |      |      | 0.83 | 0.64  |
|      | dES  |      |      |      |      | 0.72  |

**c**

| p300 |      | p300 binding |       | chromatin |       |
|------|------|--------------|-------|-----------|-------|
|      |      | GM           | K562  | GM        | K562  |
|      | HeLa | -0.20        | -0.14 | -0.20     | -0.14 |
|      | GM   |              | -0.20 |           | -0.20 |

**d**

| Enhancer |      | GM   | K562 | ES   | dES  |
|----------|------|------|------|------|------|
|          | HeLa | 0.10 | 0.07 | 0.14 | 0.26 |
|          | GM   |      | 0.16 | 0.04 | 0.07 |
|          | K562 |      |      | 0.04 | 0.19 |
|          | ES   |      |      |      | 0.36 |

**e** CTCF binding at 729 predicted insulators is highly similar across cell types

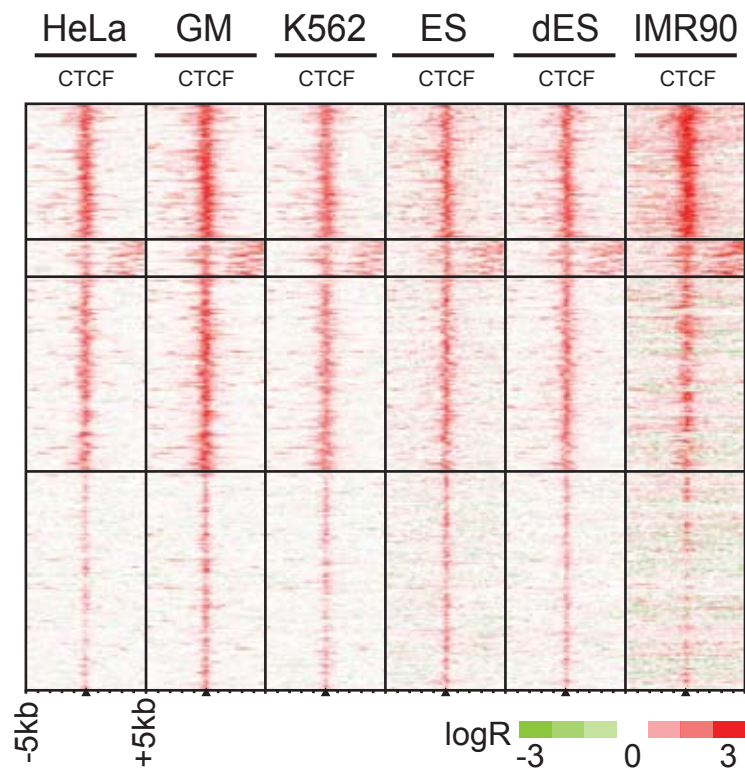

**f** Chromatin modifications at 411 distal p300 binding sites are cell type-specific

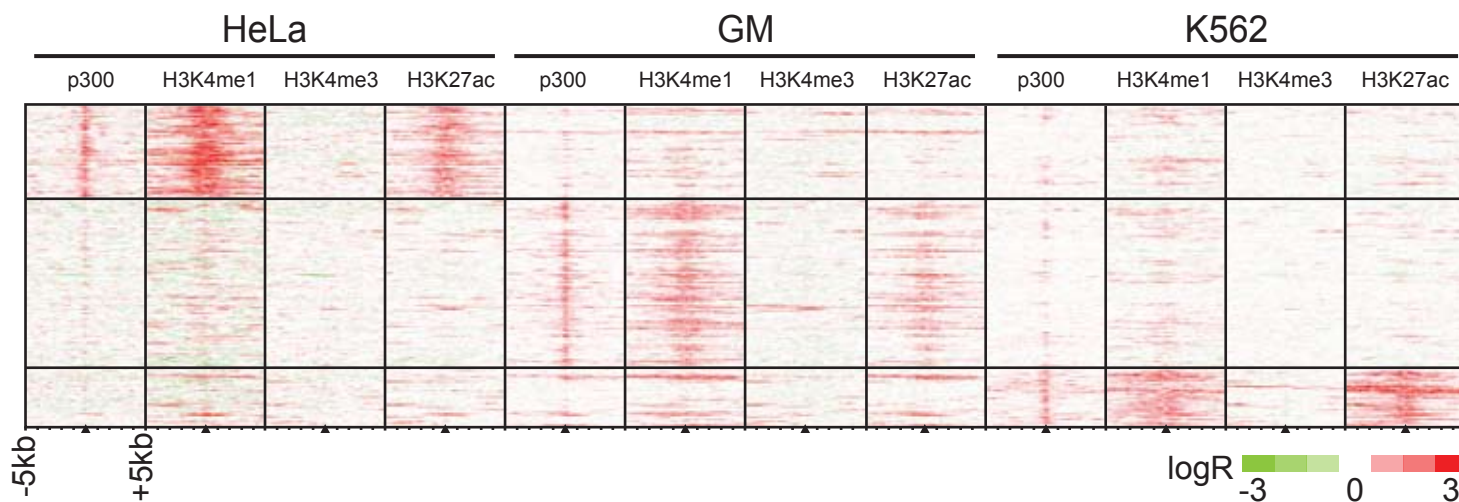

Figure S2: ChIP-chip enrichment profiles at TSS of Gencode genes

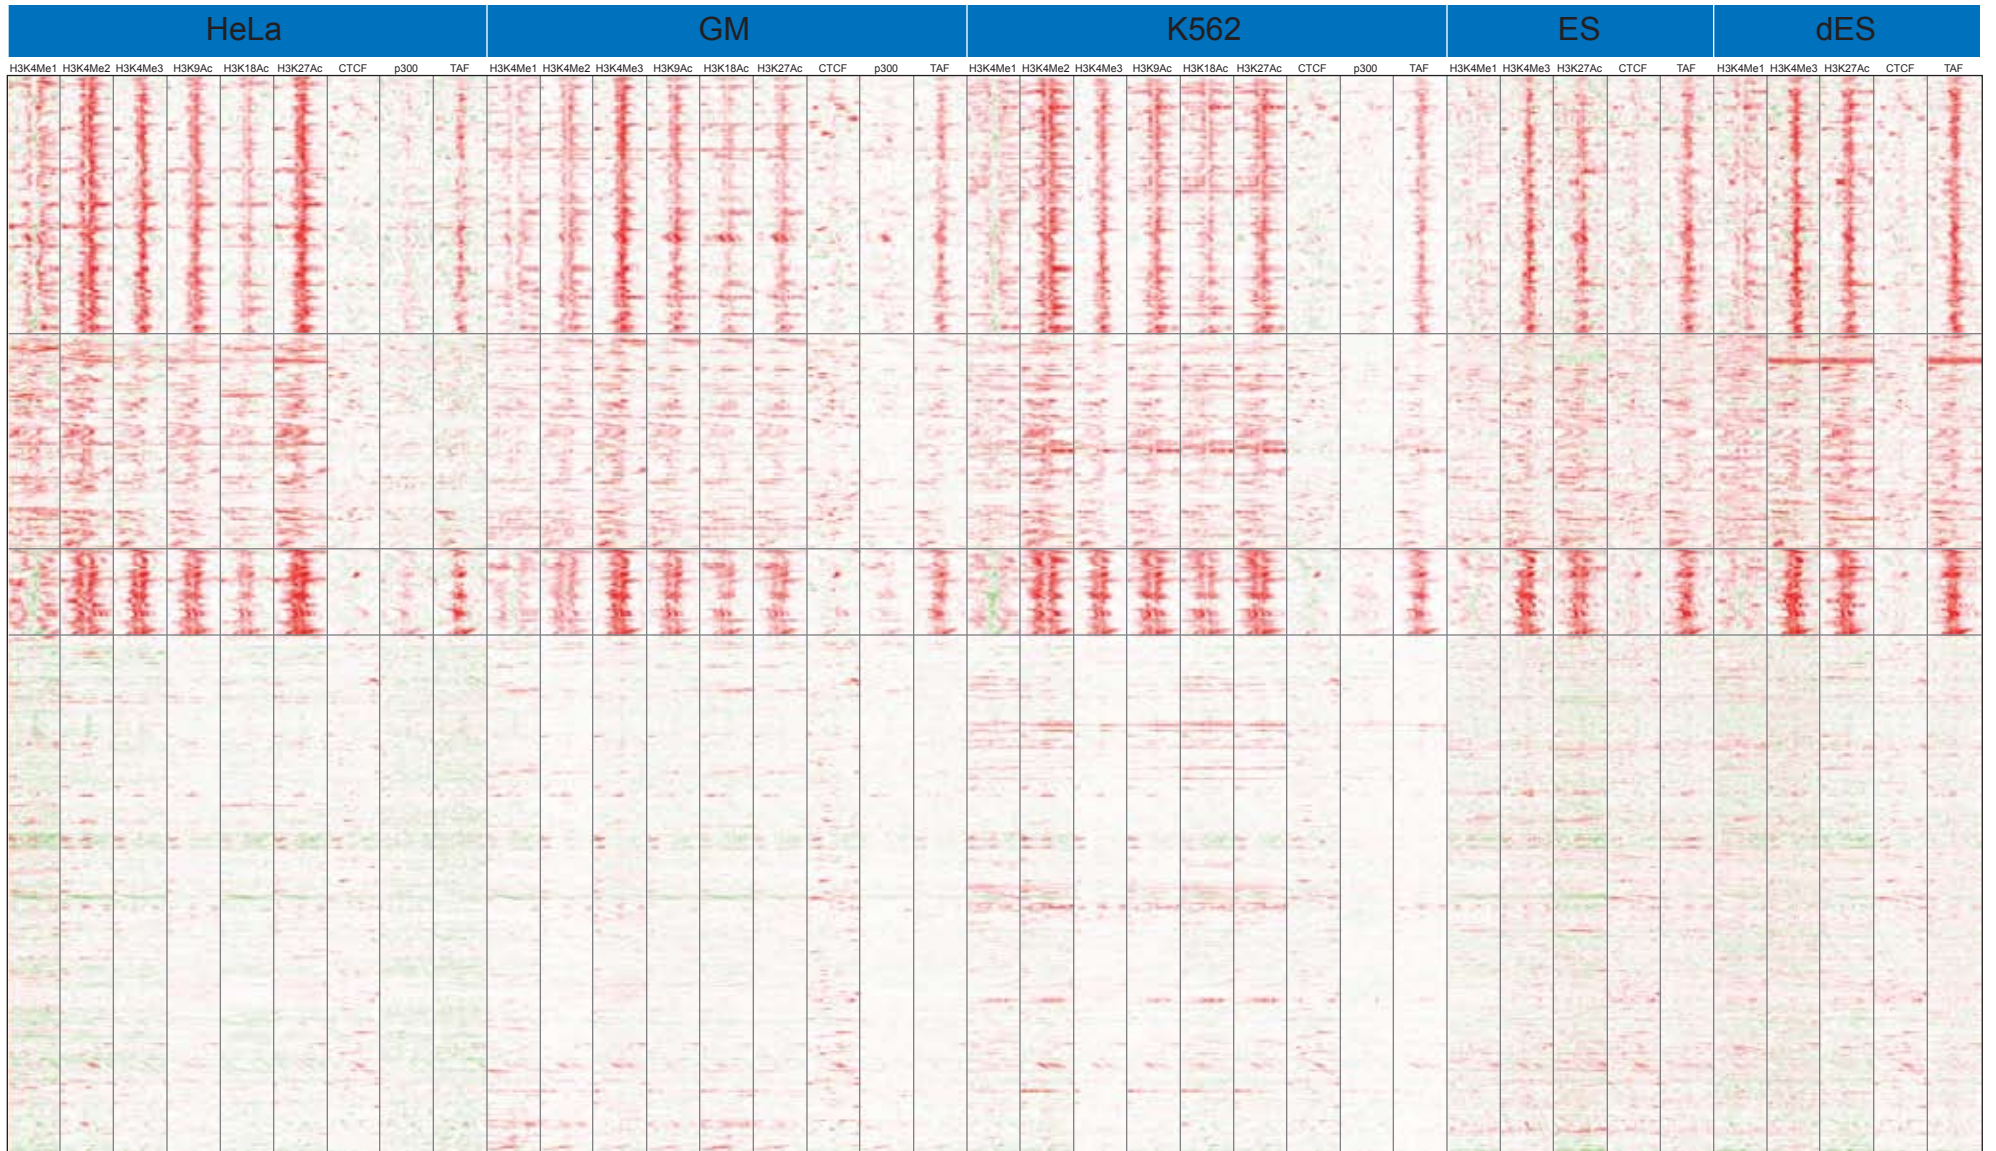

logR ■ ■ ■  
-3 0 3

Figure S3: ENCODE enhancer verification

DNase I hypersensitive sites

p300 sites

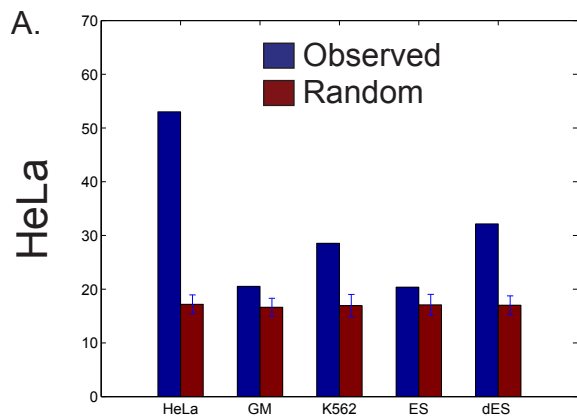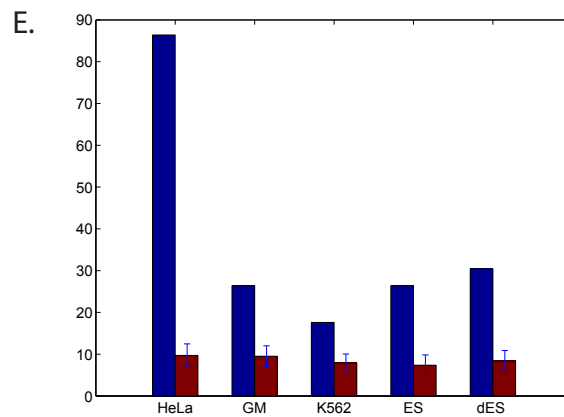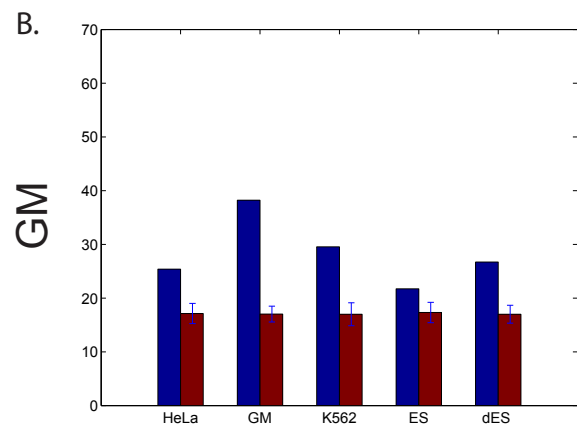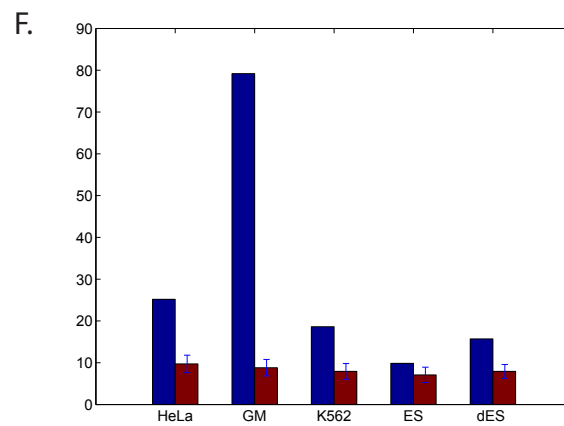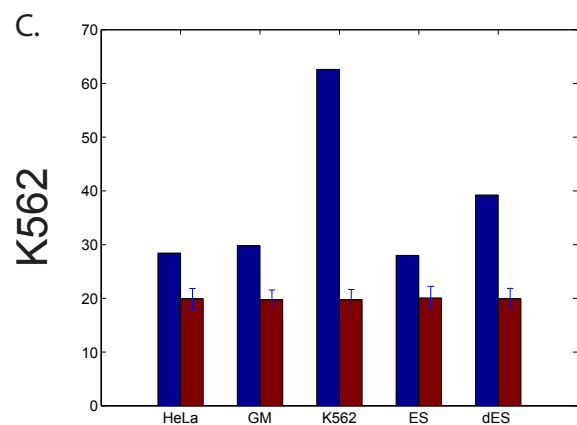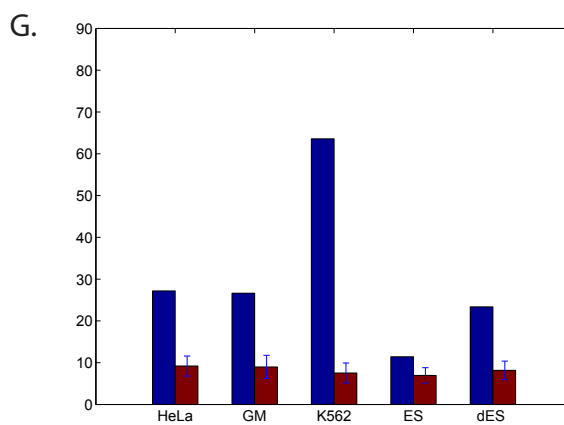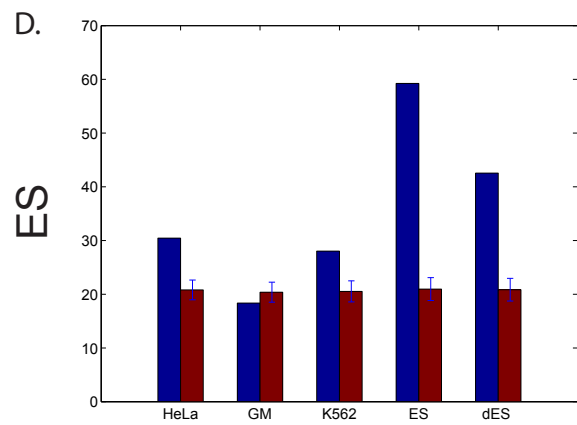

Figure S4 - ENCODE ES enhancer verification

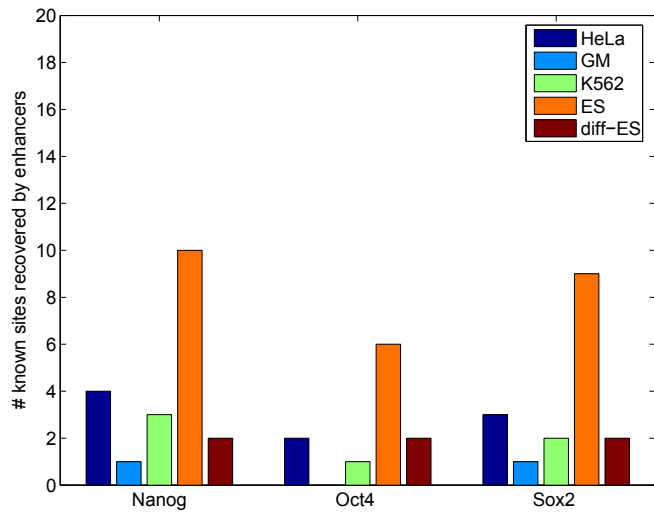

# FigureS5

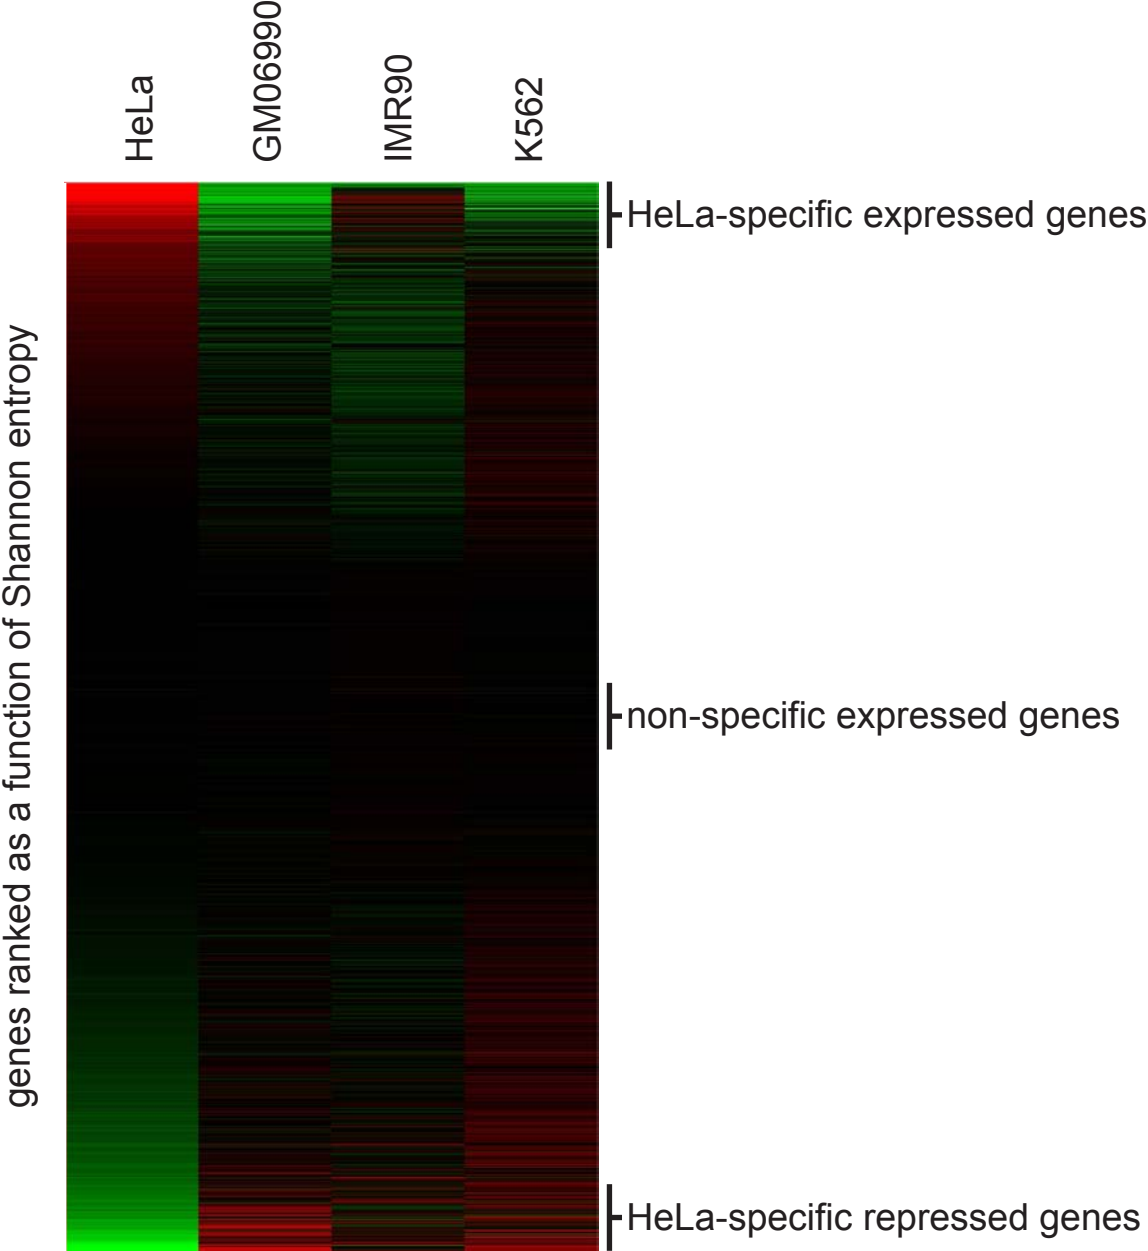



# Figure S6

CTCF enrichment data in IMR90 cells at CTCF binding sites from IMR90, HeLa and CD4+ T cells

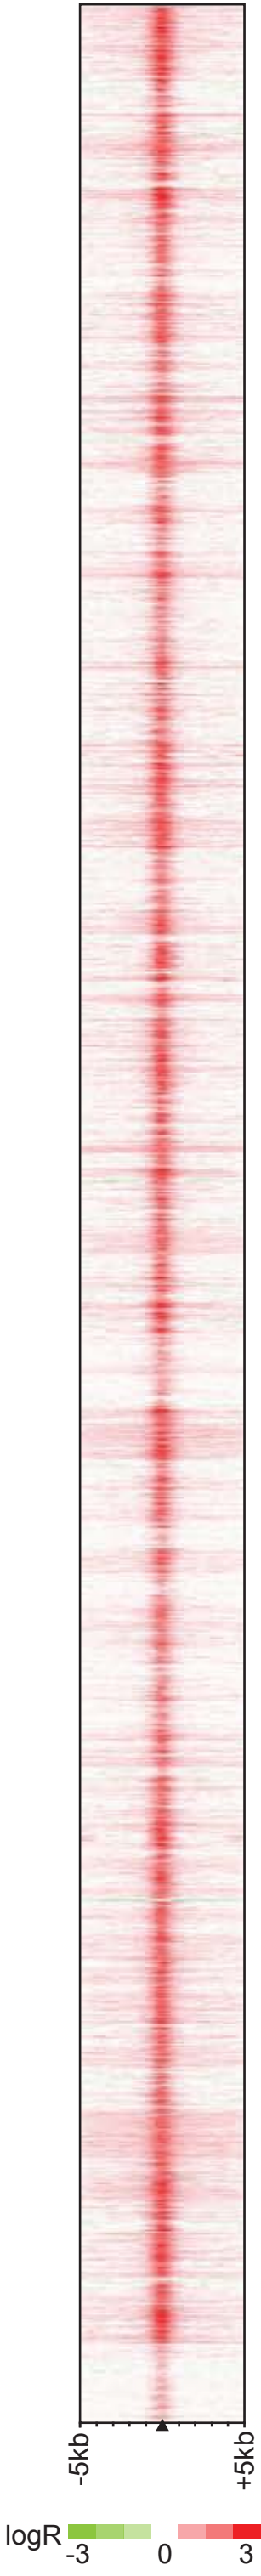

# FigureS7

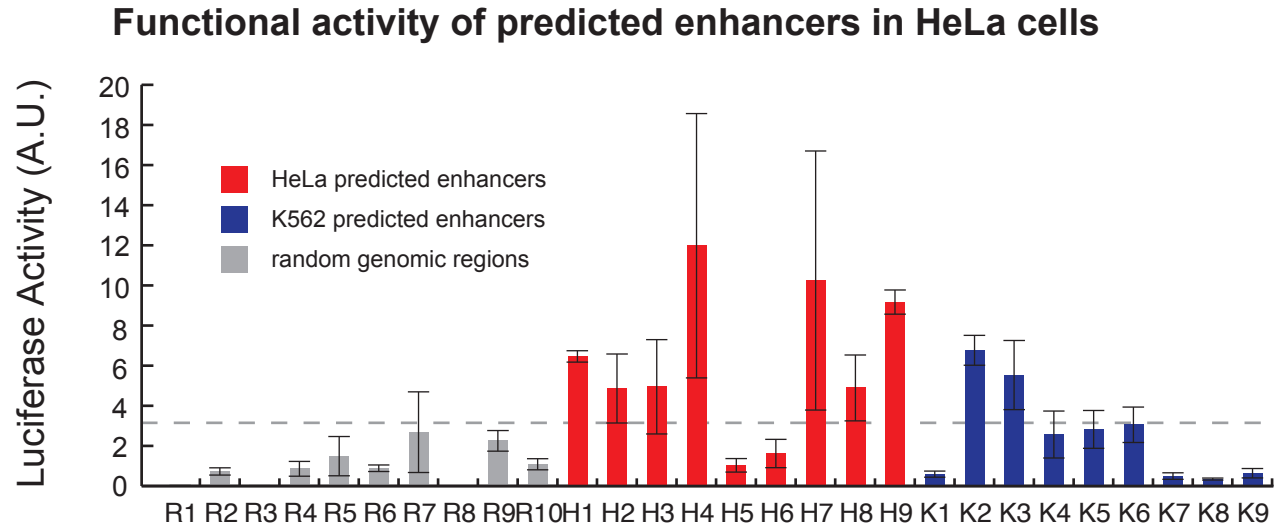

Supplement: NIHMS144932-supplement-supplemental_figures_S1-S7.pdf [file NIHMS144932-supplement-supplemental_figures_S1-S7.pdf]
