# Supplementary material
Source: PubMed Central journal article supplement (PMC2910248)
Supplement: NIHMS144932-supplement-TableS13.pdf [file NIHMS144932-supplement-TableS13.pdf]

**Table S13. De novo motifs enriched in predicted enhancer regions.**

| Name | Consensus       | Known Match (score)  | Enhancer over-conservation<br>Z-score (stdev) | Enhancer enrichment<br>Z-score (stdev) | Promoter over-conservation<br>Z-score (stdev) | Promoter enrichment<br>Z-score (stdev) | Promoter depletion<br>Z-score (stdev) |
|------|-----------------|----------------------|-----------------------------------------------|----------------------------------------|-----------------------------------------------|----------------------------------------|---------------------------------------|
| M01  | VTGABTCRC       | AP-1 (80%)           | 36.0                                          | 37.1                                   | 15.7                                          |                                        |                                       |
| M02  | TAATTGM         | NKX2-5 (88%)         | 36.0                                          | 4.2                                    | 14.8                                          |                                        |                                       |
| M03  | MAAKGTCR        | SF-1 (80%)           | 35.7                                          | 20.4                                   | 11.7                                          |                                        |                                       |
| M04  | CTTTGAW         | TCF-4 (97%)          | 32.2                                          | 8.4                                    | 12.9                                          |                                        |                                       |
| M05  | YGANTYRGC       |                      | 31.1                                          | 26.8                                   | 13.1                                          |                                        | 4.6                                   |
| M06  | GGAARTGA        | STAT1 (88%)          | 29.5                                          | 13.1                                   | 21.4                                          | 8.3                                    |                                       |
| M07  | TAATTAC         | CHX10 (80%)          | 27.2                                          | 4.3                                    | 11.0                                          |                                        |                                       |
| M08  | YTGCCNNNNNKYCMR | NF-1 (82%)           | 25.5                                          | 30.2                                   | 11.3                                          |                                        | 13.7                                  |
| M09  | YCATTAGY        |                      | 25.4                                          | 5.0                                    | 9.2                                           |                                        | 3.8                                   |
| M10  | ATYWGTCR        |                      | 23.8                                          | 14.0                                   | 6.5                                           |                                        |                                       |
| M11  | RCATTCCA        | TEF-1 (79%)          | 20.9                                          | 21.5                                   | 8.2                                           |                                        |                                       |
| M12  | RACAGMTGK       | TAL-1ALPHA/E47 (86%) | 20.3                                          |                                        | 8.8                                           |                                        | 9.3                                   |
| M13  | CNTRGCAAC       |                      | 18.9                                          | 5.6                                    | 21.7                                          |                                        |                                       |
| M14  | AAACCACA        | AML1 (86%)           | 18.6                                          | 13.1                                   | 5.8                                           |                                        | 3.7                                   |
| M15  | TGASGTCR        | CREB (85%)           | 18.4                                          | 12.7                                   | 18.6                                          | 15.7                                   |                                       |
| M16  | TAAWTTA         | POU6F1 (78%)         | 15.7                                          |                                        |                                               |                                        | 3.3                                   |
| M17  | GCCARGAA        |                      | 15.7                                          | 7.9                                    | 5.3                                           |                                        | 13.9                                  |
| M18  | CACNAGNGGG      |                      | 15.5                                          |                                        | 8.3                                           |                                        |                                       |
| M19  | GCTAWWWWTAG     | MEF-2 (83%)          | 15.3                                          | 8.6                                    | 9.0                                           | 4.2                                    |                                       |
| M20  | CATNANTAAT      |                      | 15.1                                          | 5.2                                    | 5.8                                           |                                        |                                       |
| M21  | TGTYKACR        |                      | 14.6                                          | 3.3                                    | 6.8                                           |                                        |                                       |
| M22  | GCCARNNNAACA    |                      | 12.0                                          | 15.1                                   |                                               |                                        |                                       |
| M23  | TATTNNNNYYGGC   |                      | 12.0                                          | 3.7                                    |                                               |                                        |                                       |
| M24  | YGTCNRRACA      |                      | 11.8                                          | 4.3                                    |                                               |                                        |                                       |
| M25  | TAATGAGC        | CHX10 (83%)          | 11.6                                          |                                        | 5.5                                           |                                        |                                       |
| M26  | TAATTGGC        | CHX10 (83%)          | 11.5                                          |                                        | 4.2                                           |                                        |                                       |
| M27  | AGGTTAAT        |                      | 11.5                                          | 3.7                                    |                                               |                                        |                                       |
| M28  | ATTANNNYGACR    |                      | 10.5                                          |                                        |                                               |                                        |                                       |
| M29  | GTCAGAC         |                      | 10.3                                          | 4.4                                    | 4.1                                           |                                        |                                       |
| M30  | YGTCRNNNNNATTA  |                      | 10.3                                          |                                        |                                               |                                        |                                       |
| M31  | CANYAGVTGGC     |                      | 10.1                                          |                                        | 7.3                                           |                                        | 3.6                                   |
| M32  | YGCRRTCA        |                      | 9.8                                           |                                        | 9.7                                           |                                        |                                       |
| M33  | SATCAATCR       | PBX-1 (84%)          | 9.5                                           |                                        |                                               |                                        |                                       |
| M34  | YGATTNNTGC      |                      | 9.5                                           | 4.1                                    | 7.8                                           | 4.7                                    |                                       |
| M35  | AGGCNNNNGCCAR   |                      | 8.3                                           | 9.9                                    | 3.8                                           |                                        | 18.7                                  |
| M36  | GCCRRNNNNNATTA  |                      | 7.5                                           |                                        |                                               |                                        | 8.6                                   |
| M37  | GGAAWTNCCC      | P65 (94%)            | 7.4                                           | 5.5                                    | 4.5                                           |                                        |                                       |
| M38  | CAKCTGGA        | RP58 (85%)           | 7.3                                           | 4.9                                    | 4.4                                           |                                        | 12.9                                  |
| M39  | AGCAGCTGC       | AP-4 (90%)           | 6.5                                           |                                        | 4.2                                           |                                        |                                       |
| M40  | RCCATATGGY      |                      | 4.7                                           |                                        |                                               |                                        | 8.4                                   |
| M41  | GTYNCCANRGNRAC  |                      | 3.7                                           |                                        | 4.1                                           |                                        |                                       |
